# Supplementary material for: Metformin and glucose starvation decrease the migratory ability of hepatocellular carcinoma cells: targeting AMPK activation to control migration
Source: PubMed Central journal article supplement (PMC6391381; doi:10.1038/s41598-019-39556-w), 2019-02-26

**Title: Metformin and glucose starvation decrease the migratory ability of hepatocellular carcinoma cells: targeting AMPK activation to control migration**

**Authors: Anabela C. Ferretti, Florencia Hidalgo, Facundo M. Tonucci, Evangelina Almada, Alejandro Pariani, María C. Larocca, Cristián Favre**

RAW DATA FIG. 2

C3A

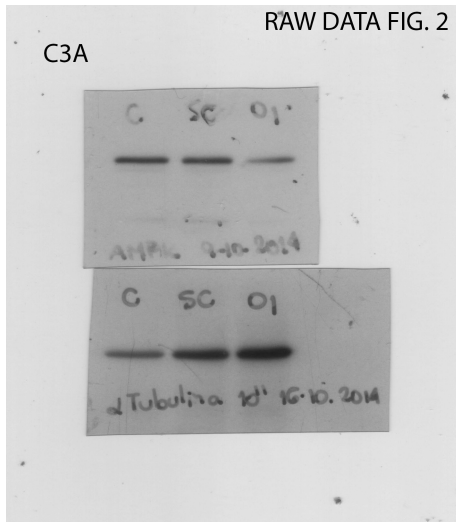

RAW DATA FIG. 2

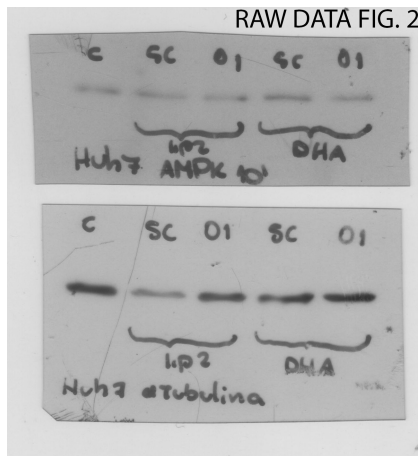

RAW DATA FIG. 3

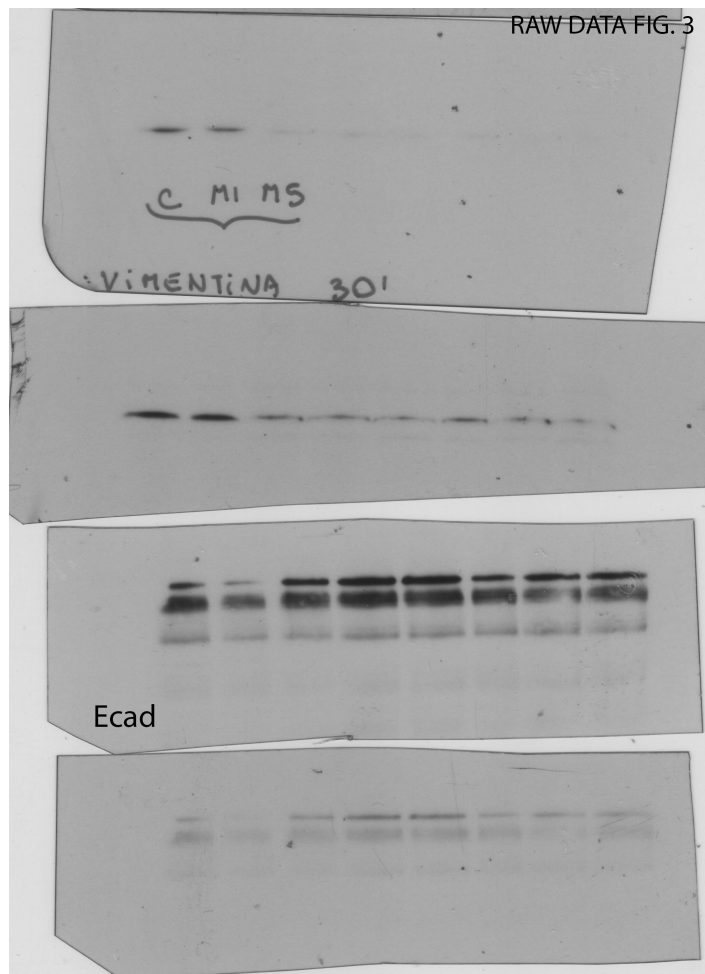



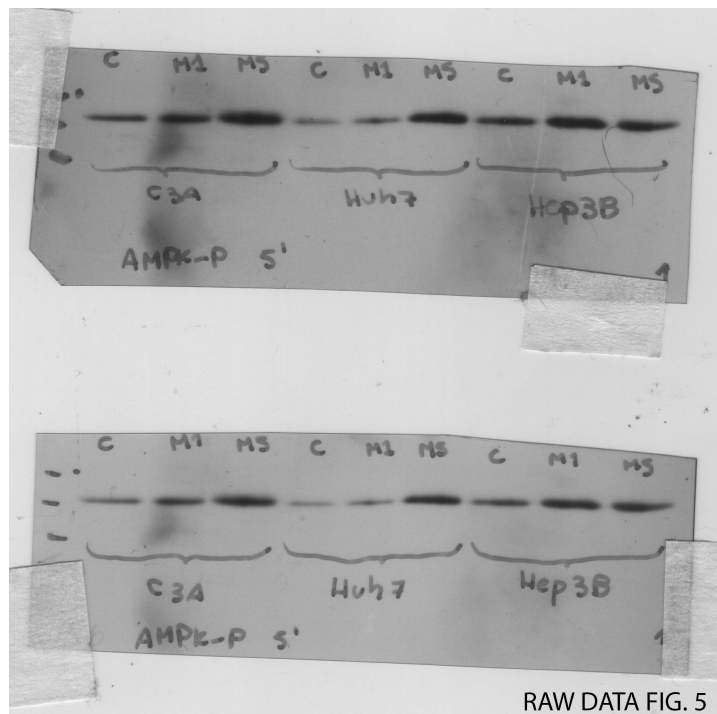

RAW DATA FIG. 5

RAW DATA FIG. 5

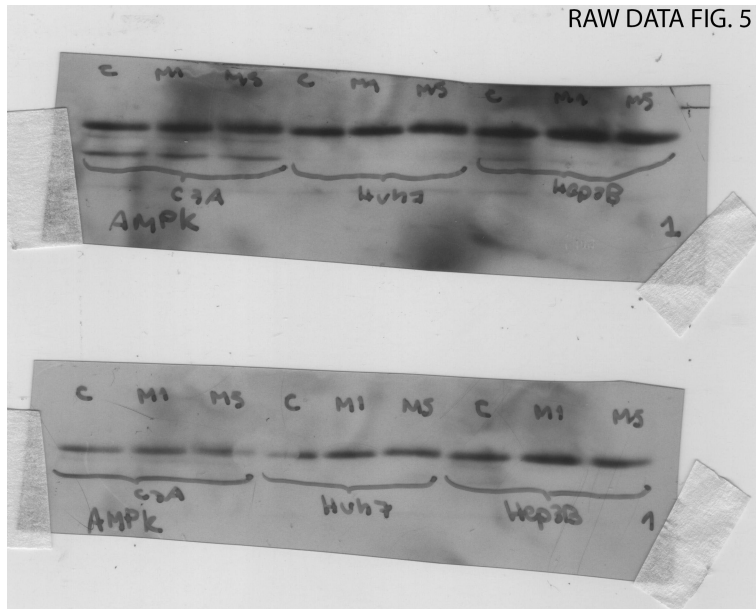

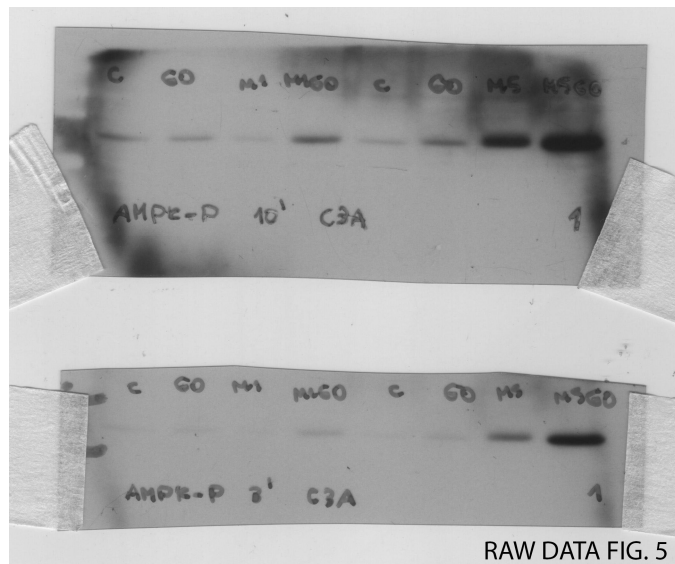

RAW DATA FIG. 5



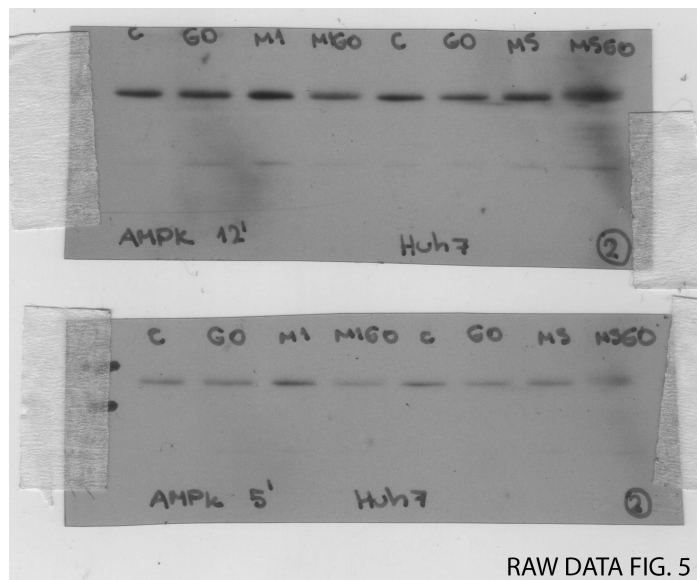

RAW DATA FIG. 5

RAW DATA FIG. 5

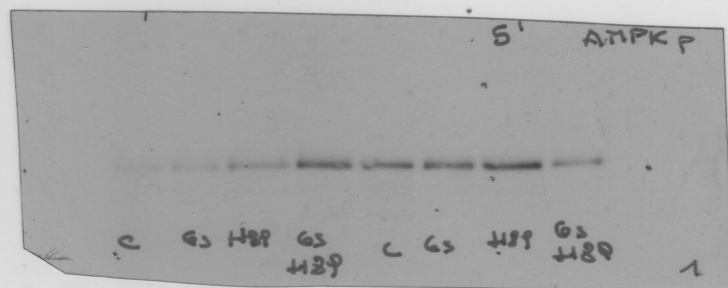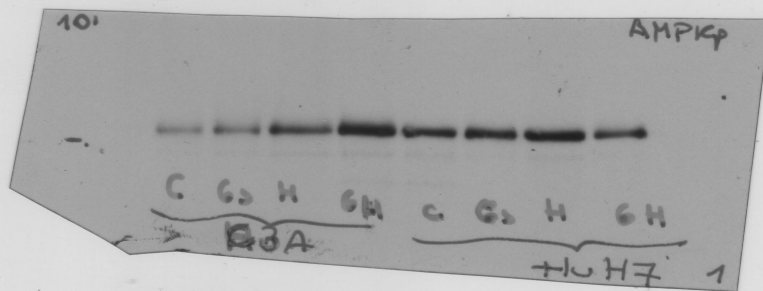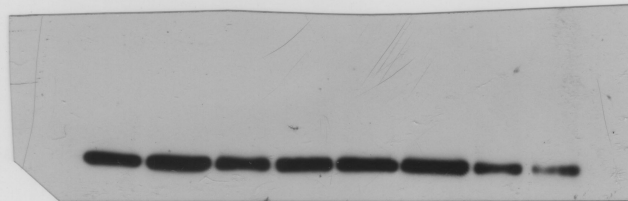

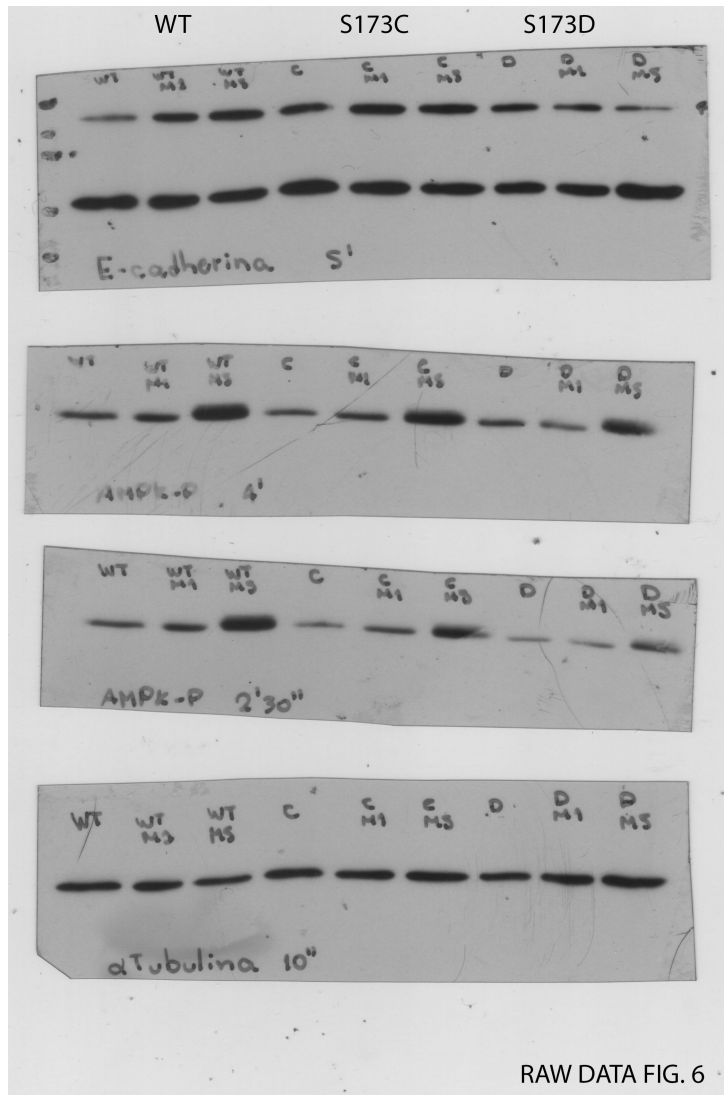

Supplement: 41598_2019_39556_MOESM2_ESM.pdf [file 41598_2019_39556_MOESM2_ESM.pdf]
